# Supplementary material for: Visible ozone detection and removal in two-dimensional Mn(ii)-based metal–organic frameworks
Source: Royal Society of Chemistry journal article supplement (doi:10.1039/d3ta07938d), 2024-01-01
Supplement: d3ta07938d1.pdf [file d3ta07938d1.pdf]

## Supporting Information

### **Visible Ozone Detection and Removal in Two-Dimensional Mn(II)-Based Metal-Organic Frameworks**

Chen Dong<sup>ab</sup>, Tao He<sup>a</sup>, Wei Wu<sup>a</sup>, Guang-Rui Si<sup>a</sup>, Lin-Hua Xie,<sup>\*a</sup> Jian-Rong Li<sup>a</sup>

<sup>a</sup> Beijing Key Laboratory for Green Catalysis and Separation and Department of Chemical Engineering, Beijing University of Technology, Beijing 100124, China.

<sup>b</sup> National Engineering Research Center for Rare Earth, Grirem Advanced Materials Co., Ltd., Beijing 100088, China.

E-mail: xielinhua@bjut.edu.cn

## Table of Contents

|                                                   |          |
|---------------------------------------------------|----------|
| <b>Section 1. Chemicals and Instruments .....</b> | <b>1</b> |
| <b>Section 2. Experimental Section.....</b>       | <b>2</b> |
| <b>Section 3 Crystallographic Data .....</b>      | <b>3</b> |
| <b>Section 4 Supplementary Figures .....</b>      | <b>4</b> |

## Section 1. Chemicals and Instruments

All general reagents and solvents were commercially purchased used as received without further purification unless otherwise noticed. Manganese chloride tetrahydrate ( $\text{MnCl}_2 \cdot 4\text{H}_2\text{O}$ ), methanol (MeOH), alcohol (EtOH), 1-Bromododecane, 1-Bromohexadecane, and 1-Bromoicosane were purchased from Beijing InnoChem Science & Technology Co., Ltd. Potassium carbonate ( $\text{K}_2\text{CO}_3$ ), hydrochloric acid (HCl), and sodium hydroxide (NaOH) were purchased from Beijing Chemical Reagent Company. *N,N*-dimethylformamide (DMF), tetrahydrofuran (THF), and hydrazine hydrate (50%) were bought from Sinopharm Chemical Reagent Co. Ltd. 4-watt UV lamp was bought from Beijing Aerospace HONGDA Optoelectronics Technology Co. Ltd.  $\text{O}_3$  monitor (Model 205) was bought from 2B Technologies. Humidity generator (HSDG-A) was bought from Suzhou Huaxiangshida Environmental Protection Technology Co., Ltd.

The powder X-ray diffraction (PXRD) patterns were recorded on a Rigaku Smartlab3 X-ray Powder Diffractometer equipped with a Cu-sealed tube ( $\lambda = 1.54178 \text{ \AA}$ ).  $\text{N}_2$  adsorption/desorption isotherms were measured by using a BELSORP MAX II Surface Characterization Analyzer at 77 K.  $^1\text{H}$  NMR data were recorded on a Bruker Avance 400 MHz spectrometer. An IR Affinity-1 instrument was used for recording Fourier transform infrared (FT-IR) spectra. Thermogravimetric analysis (TGA) data were obtained on a TGA-50 (Shimadzu) thermogravimetric analyzer with heating from 25 to 800 °C ( $10 \text{ °C min}^{-1}$ ) under air atmosphere. X-ray photoelectron spectroscopy (XPS) measurements were carried out using an ESCALAB 250 instrument. The water contact angles were measured on the contact angle system JY-82C (Chengde Dingsheng, China).

## Section 2. Experimental Section

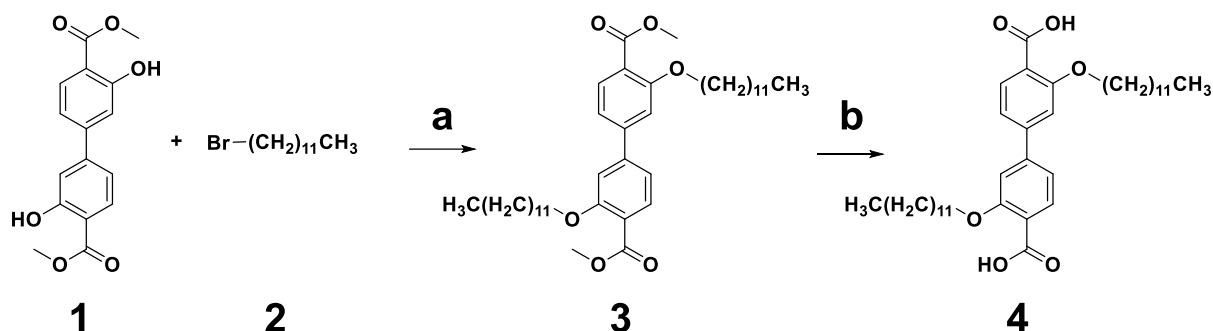

Scheme S1. Synthetic procedure for H<sub>2</sub>L<sub>1</sub>.

**Synthesis of H<sub>2</sub>L<sub>1</sub>.** Dimethyl 3,3'-dihydroxy-[1,1'-biphenyl]-4,4'-dicarboxylate (**1**, 302 mg, 1 mmol), 1-Bromododecane (**2**, 623 mg, 2.5 mmol), K<sub>2</sub>CO<sub>3</sub> (276 mg, 2 mmol) and DMF (5 mL) were added to a 50 mL one-neck flask equipped with a condenser. The reaction mixture was heated to 85 °C and stirred for 3 h. After cooling to room temperature, the reaction mixture was concentrated in vacuo to remove a portion of the DMF. After that a mixed solution of methanol (10 mL), THF (10 mL), and NaOH solution (10 mL, 2 M) was added. The mixture was heated to 80 °C and stirred for 8 hours. The THF and MeOH were evaporated, and then dilute HCl was added to the remaining aqueous solution until the solution was at pH =3. The solid was collected by filtration, washed with water, and dried to give the final product as white solid (H<sub>2</sub>L<sub>1</sub>, **4**). <sup>1</sup>H NMR (400MHz, DMSO-*d*<sub>6</sub>) δ: 7.71 (d, 1H), 7.35-7.31(m, 2H), 4.16 (t, 2H), 1.74 (m, 2H), 1.46 (m, 2H), 1.24 (m, 12H), 0.87-0.83 (d, 4H).

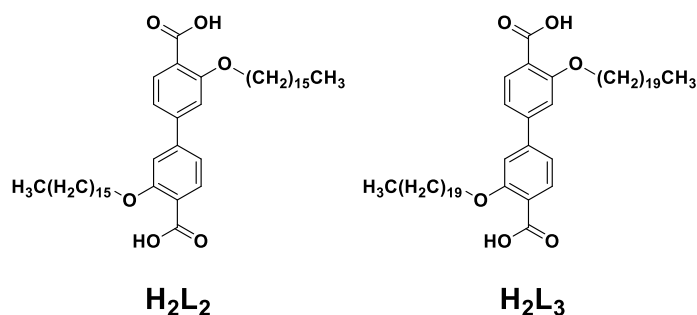

Scheme S2. H<sub>2</sub>L<sub>2</sub> and H<sub>2</sub>L<sub>3</sub> ligands.

**Synthesis of H<sub>2</sub>L<sub>2</sub>.** The synthetic method of H<sub>2</sub>L<sub>2</sub> is similar to that of H<sub>2</sub>L<sub>1</sub>, except that compound **2** was replaced by 1-bromohexadecane. The product is a light pink solid (Scheme S2). <sup>1</sup>H NMR (400 MHz, CDCl<sub>3</sub>) δ: 8.30 (d, 1H), 7.35 (d, 1H), 7.24 (s, 1H), 4.36 (t, 2H), 1.99 (m, 2H), 1.54 (m, 2H), 1.41 (m, 2H), 1.27 (m, 18H), 0.89 (t, 4H)

**Synthesis of H<sub>2</sub>L<sub>3</sub>.** The synthetic method of H<sub>2</sub>L<sub>3</sub> is similar to that of H<sub>2</sub>L<sub>1</sub>, except that compound **2** was replaced by 1-bromoicosane. The product is a white solid (Scheme S2). <sup>1</sup>H NMR (400 MHz, CDCl<sub>3</sub>) δ: 8.32 (d, 1H), 7.36 (d, 1H), 7.22 (s, 1H), 4.36 (t, 2H), 1.99 (m, 2H), 1.54-1.28 (m, 24H), 0.89 (t, 10H).

### Section 3 Crystallographic Data

**Table S1.** Crystal data and structural refinement of BUT-82 (CCDC number: 2277540).

|                                                              |                                                                                           |
|--------------------------------------------------------------|-------------------------------------------------------------------------------------------|
| Compound name                                                | BUT-82                                                                                    |
| Empirical formula                                            | C <sub>76</sub> H <sub>112</sub> O <sub>12</sub> Mn <sub>2</sub>                          |
| Formula weight                                               | 1327.53                                                                                   |
| Temperature (K)                                              | 293(4)                                                                                    |
| Crystal system                                               | triclinic                                                                                 |
| Space group                                                  | <i>P</i> -1                                                                               |
| <i>a</i> (Å)                                                 | 7.7021(3)                                                                                 |
| <i>b</i> (Å)                                                 | 22.3914(11)                                                                               |
| <i>c</i> (Å)                                                 | 23.6873(16)                                                                               |
| $\alpha$ (°)                                                 | 112.516(5)                                                                                |
| $\beta$ (°)                                                  | 90.520(4)                                                                                 |
| $\gamma$ (°)                                                 | 99.496(4)                                                                                 |
| <i>V</i> (Å <sup>3</sup> )                                   | 3710.3(4)                                                                                 |
| <i>Z</i>                                                     | 2                                                                                         |
| Calculated density (g/cm <sup>3</sup> )                      | 0.941                                                                                     |
| <i>F</i> (000)                                               | 4720.0                                                                                    |
| $\mu$ /mm <sup>-3</sup>                                      | 3.125                                                                                     |
| Reflections collected                                        | 45260                                                                                     |
| Independent reflections                                      | 8702 [ <i>R</i> (int) = 0.0997]                                                           |
| Goodness-of-fit on <i>F</i> <sup>2</sup>                     | 0.967                                                                                     |
| Final <i>R</i> indices [ <i>I</i> > 2 $\sigma$ ( <i>I</i> )] | <i>R</i> <sub>1</sub> <sup>a</sup> = 0.1303, <i>wR</i> <sub>2</sub> <sup>b</sup> = 0.3258 |
| <i>R</i> indices (all data)                                  | <i>R</i> <sub>1</sub> = 0.1631, <i>wR</i> <sub>2</sub> = 0.3550                           |
| Largest diff. peak and hole (e/Å <sup>3</sup> )              | 2.331/-0.857                                                                              |

<sup>a</sup>  $R_1 = \sum(|F_0| - |F_c|) / \sum|F_0|$ .

<sup>b</sup>  $wR_2 = [\sum w(|F_0|^2 - |F_c|^2)^2 / \sum w(F_0^2)]^{1/2}$

**Section 4 Supplementary Figures**

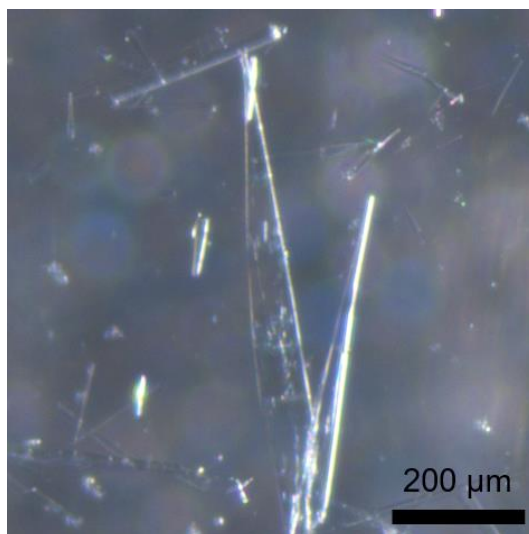

**Figure S1.** The image for BUT-82 single crystal under an optical microscope.

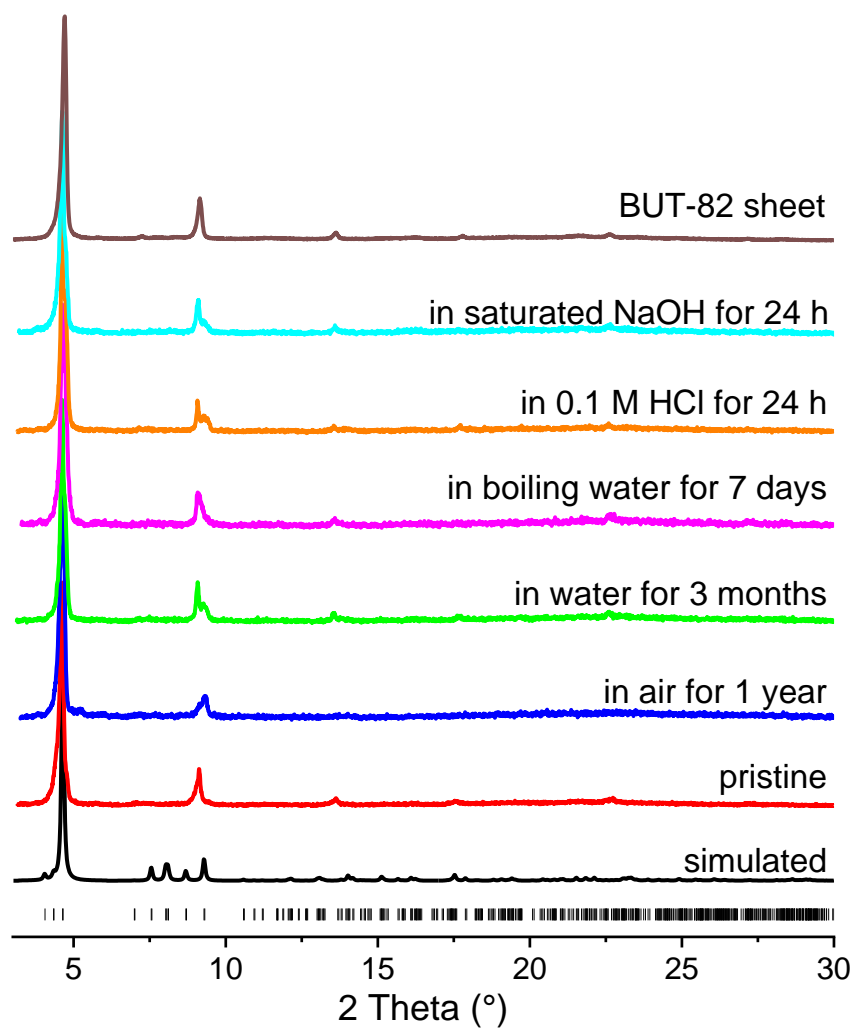

**Figure S2.** PXRD patterns of BUT-82 samples treated under different conditions.

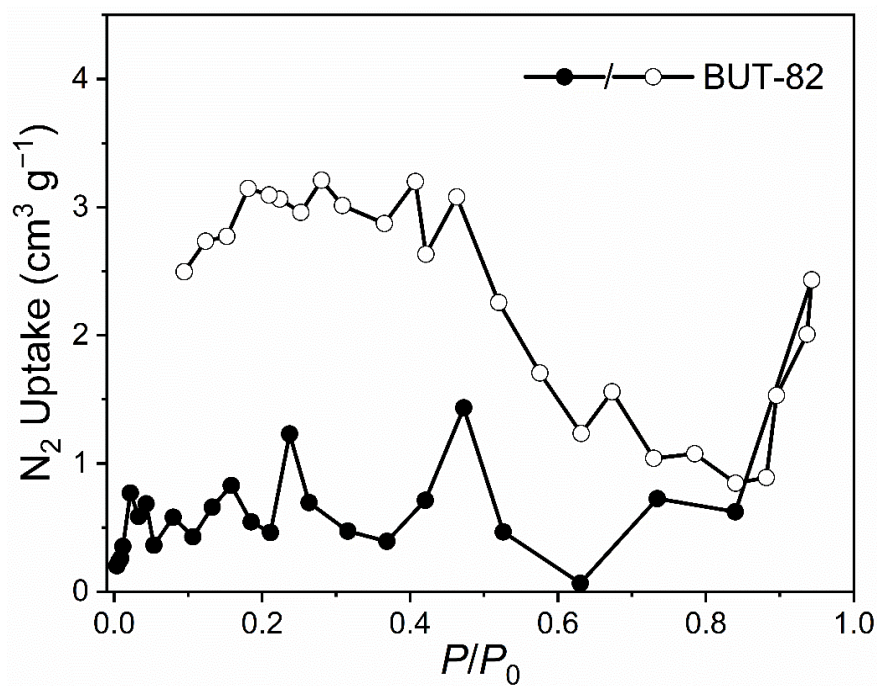

Figure S3. (a)  $N_2$  adsorption/desorption isotherms at 77 K for BUT-82.



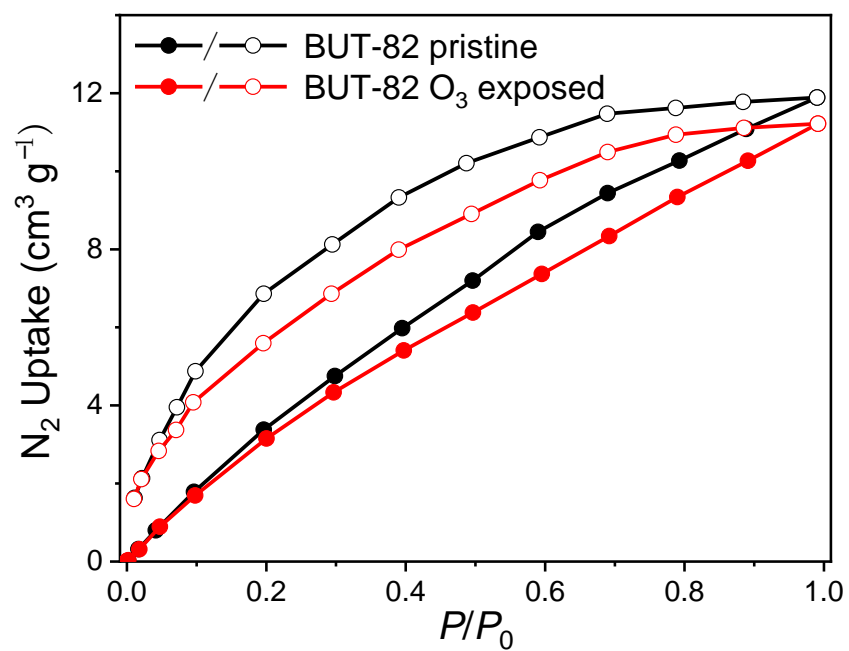

**Figure S4.** (a) CO<sub>2</sub> adsorption/desorption isotherms of pristine and O<sub>3</sub> exposed BUT-82 at 195 K.

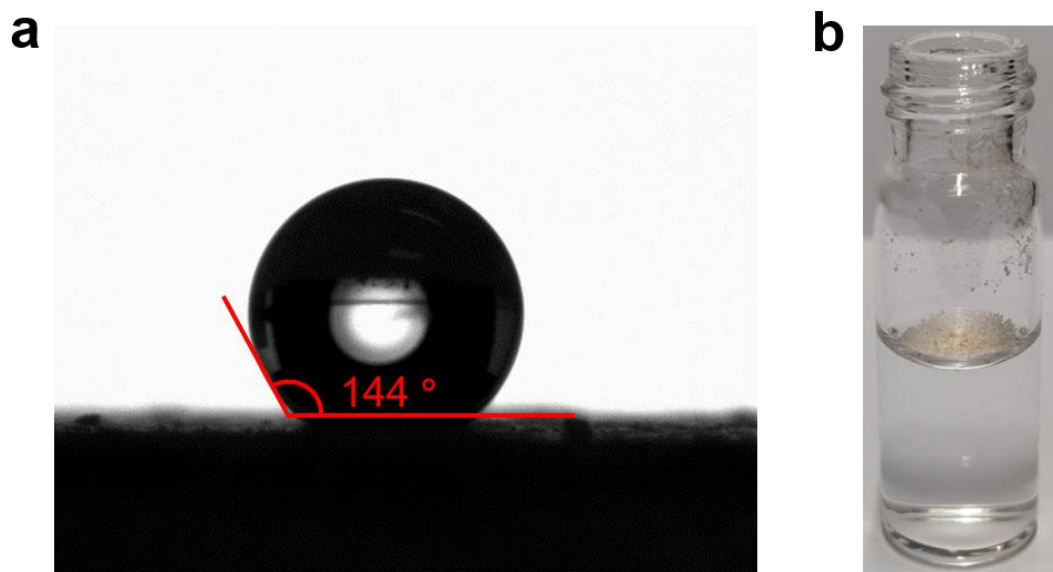

**Figure S5.** The static water contact angle of BUT-82. (b) The photo of BUT-82 crystals floating on the water surface.

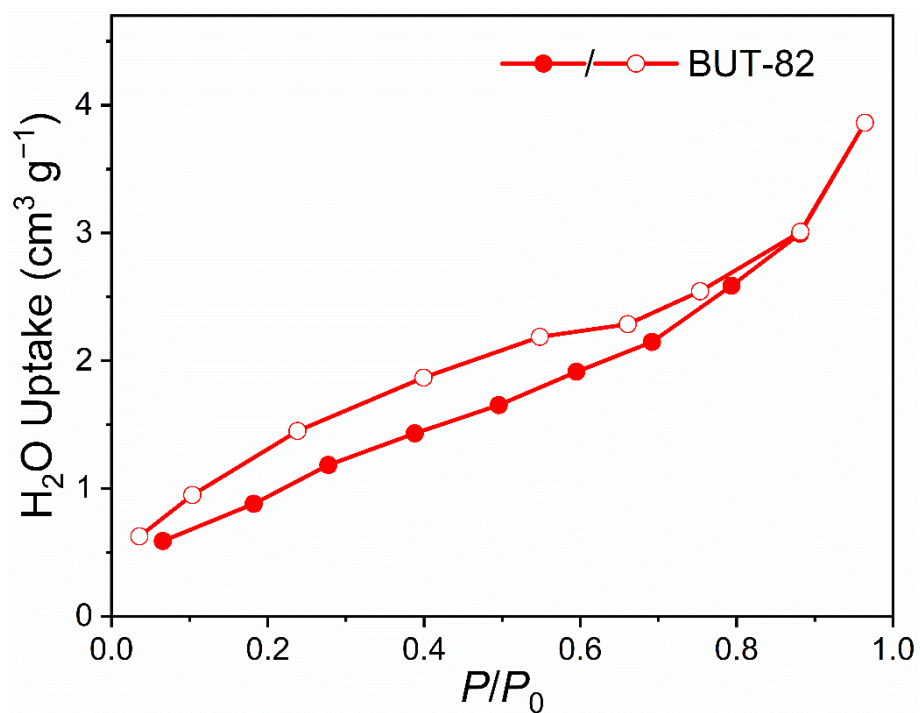

**Figure S6.** Water adsorption/desorption isotherms at 298 K for BUT-82.

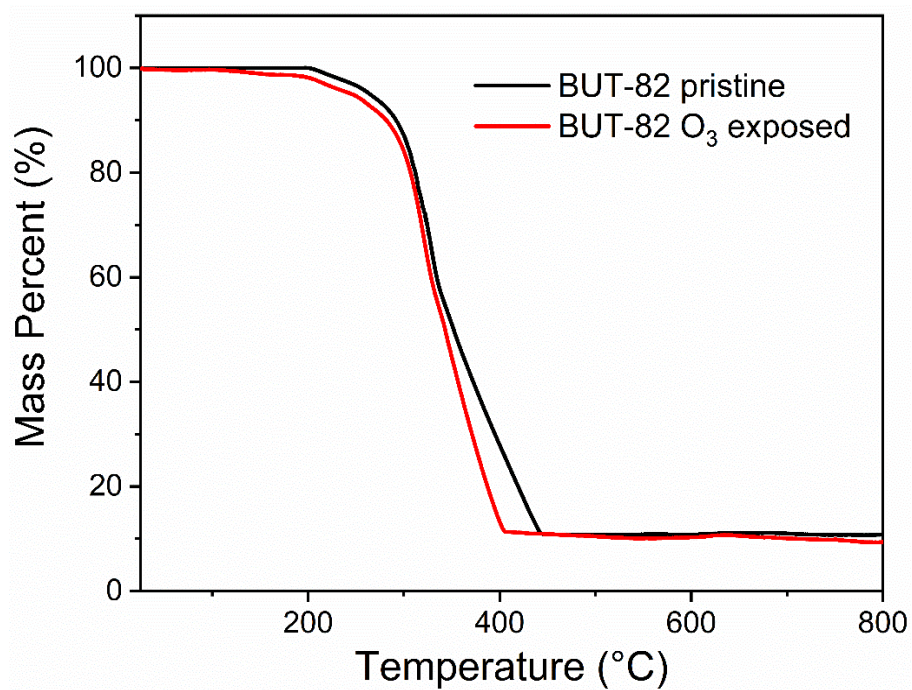

**Figure S7.** The TGA curves of pristine and O<sub>3</sub> exposed BUT-82 samples recorded under air flow.

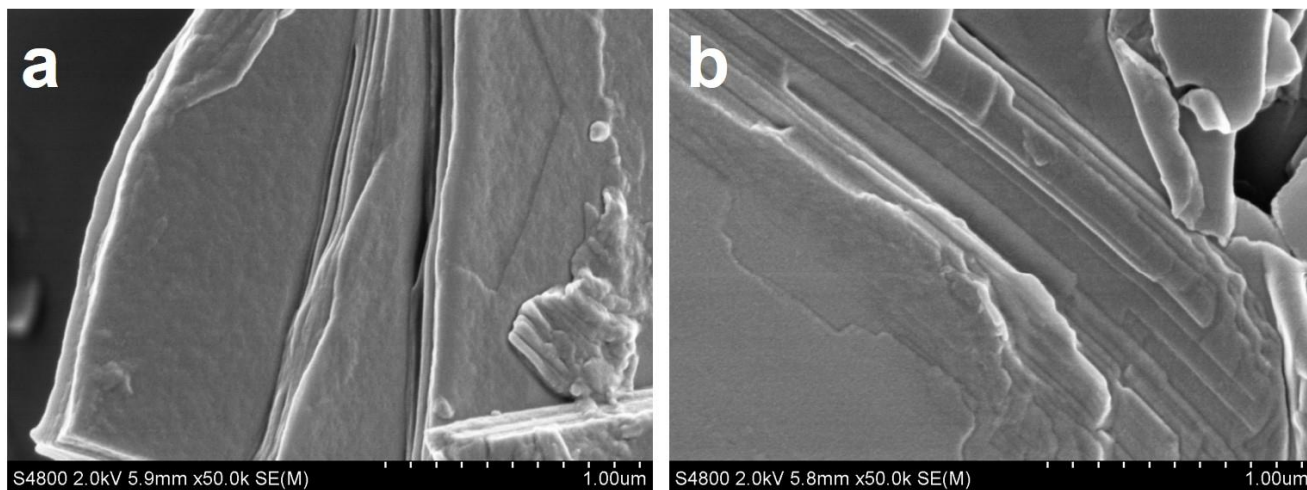

**Figure S8.** SEM images of a) pristine and b) O<sub>3</sub> exposed BUT-82.

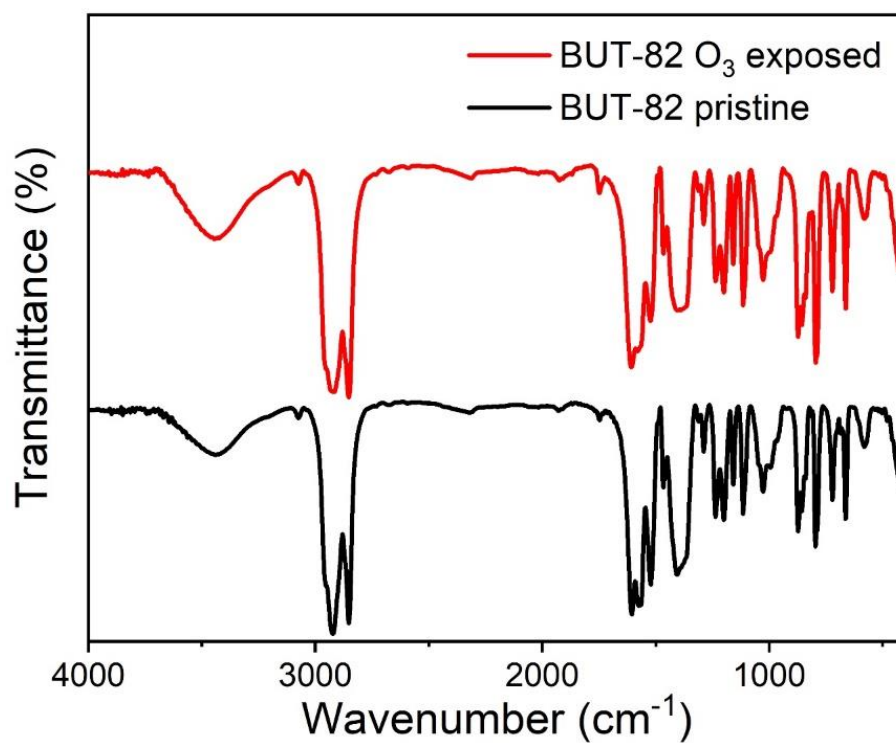

**Figure S9.** The FT-IR spectra of pristine and O<sub>3</sub> exposed BUT-82 samples.

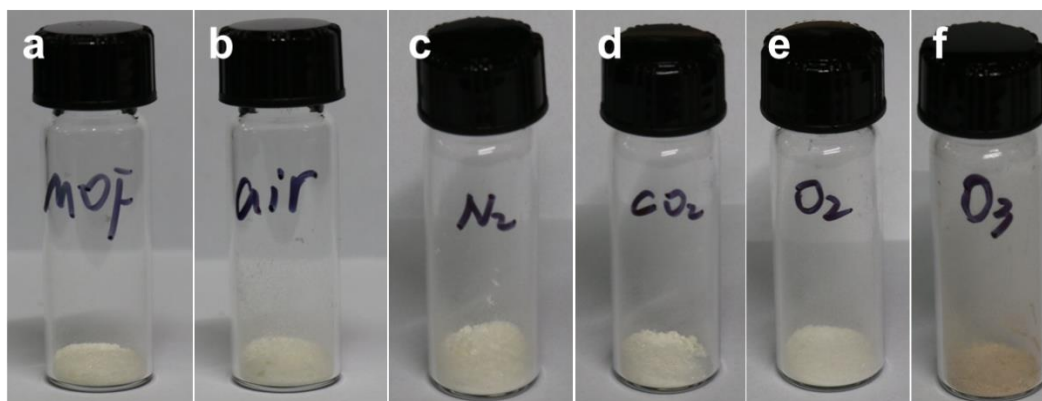

**Figure S10.** Photographs of the color changes observed for BUT-82 treating with different gases for 30 min. (a) pristine BUT-82; (b) air; (c) N<sub>2</sub>; (d) CO<sub>2</sub>; (e) O<sub>2</sub>; (f) O<sub>3</sub>.

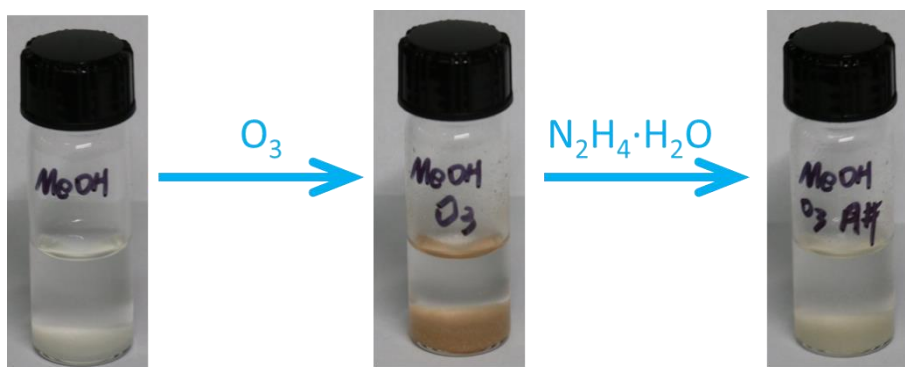

**Figure S11.** Photographs of BUT-82 dispersed in MeOH after O<sub>3</sub> and subsequent N<sub>2</sub>H<sub>4</sub>·H<sub>2</sub>O vapor bubbling treatment, respectively.



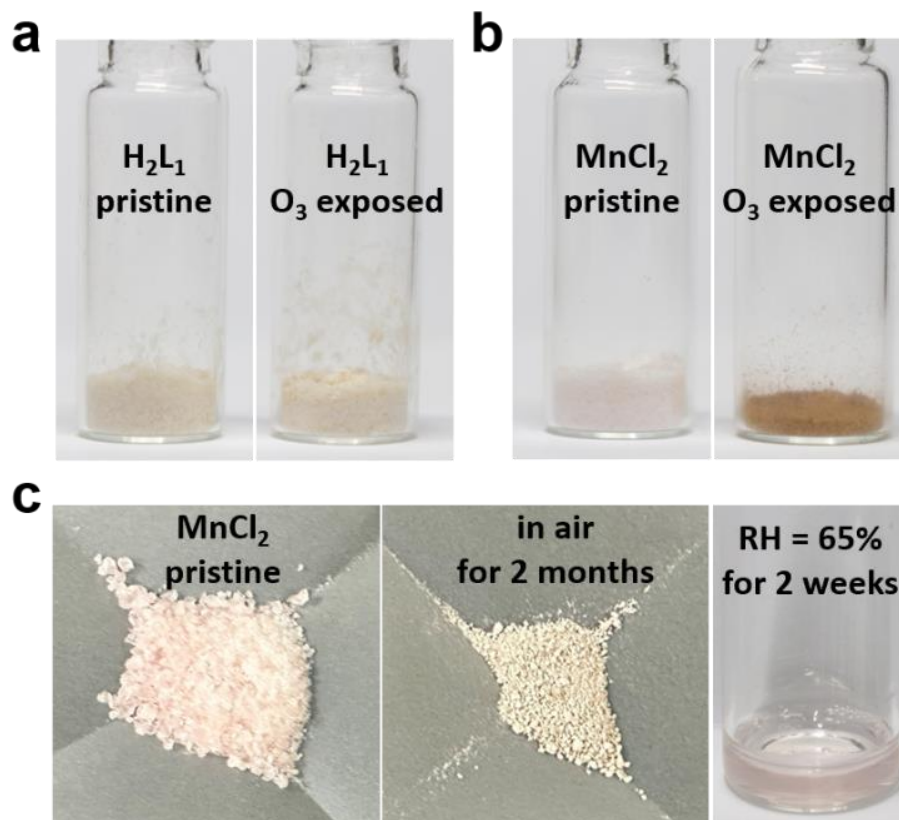

**Figure S12.** (a) H<sub>2</sub>L<sub>1</sub> ligand and (b) MnCl<sub>2</sub>·4H<sub>2</sub>O after 10 min of 10 ppm O<sub>3</sub> purging. (c) Changes of color and state of MnCl<sub>2</sub>·4H<sub>2</sub>O after placing in air or high humidity environment.

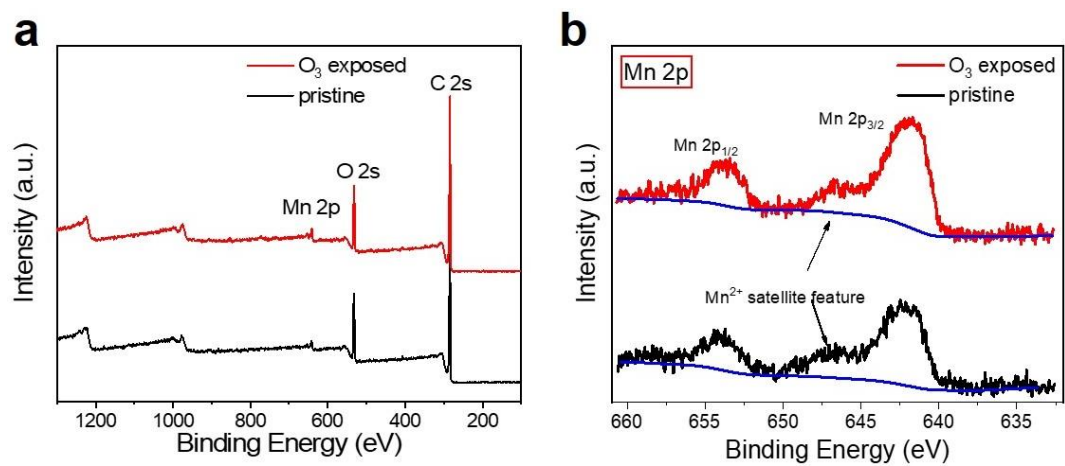

**Figure S13.** The XPS (a) survey and (b) Mn 2p spectra of pristine and O<sub>3</sub> exposed BUT-82 samples.

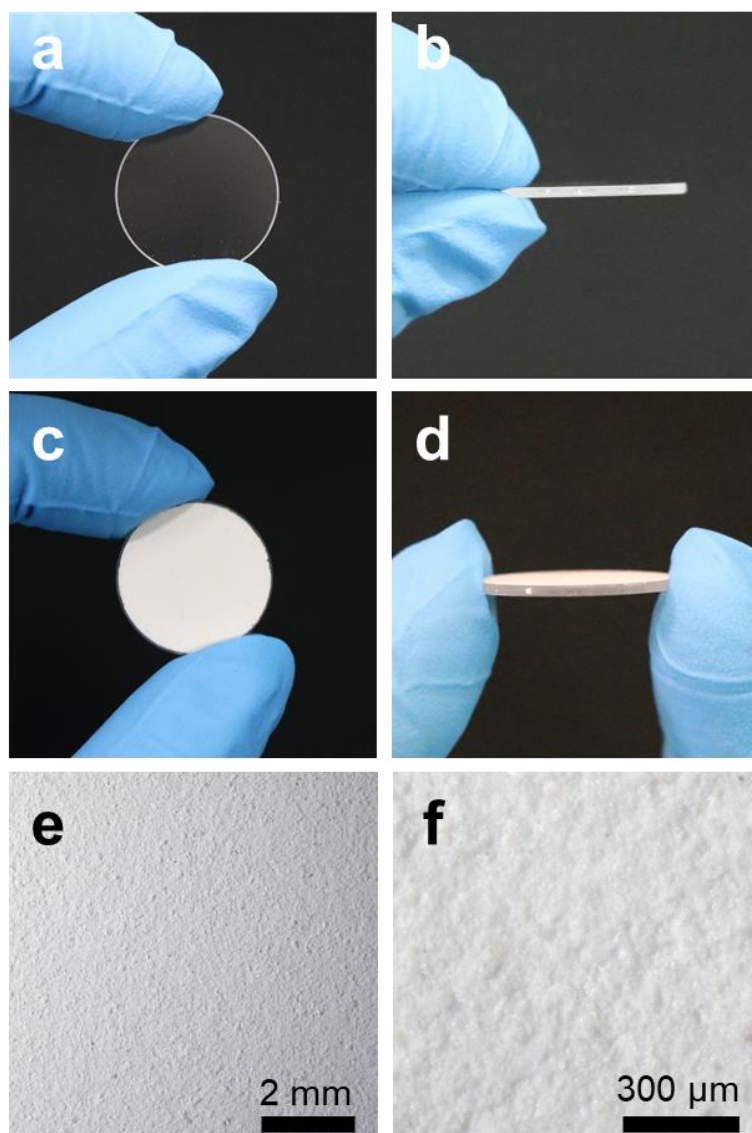

**Figure S14.** Photographs of (a, b) blank quartz wafer and (c, d) BUT-82 film. (e, f) Images of the BUT-82 film under an optical microscope.

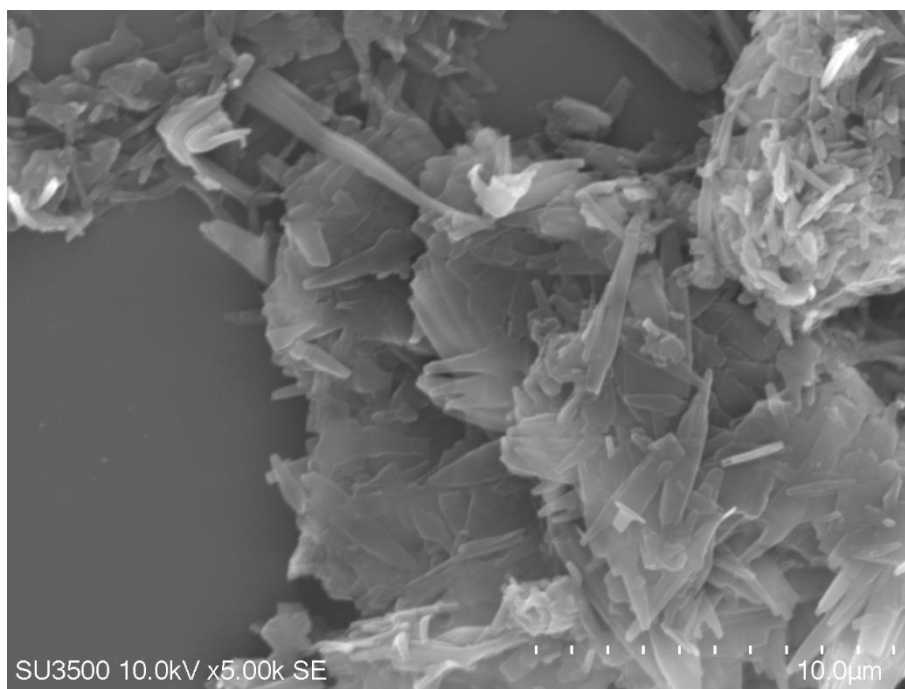

**Figure S15.** The SEM image for BUT-82 microcrystal.

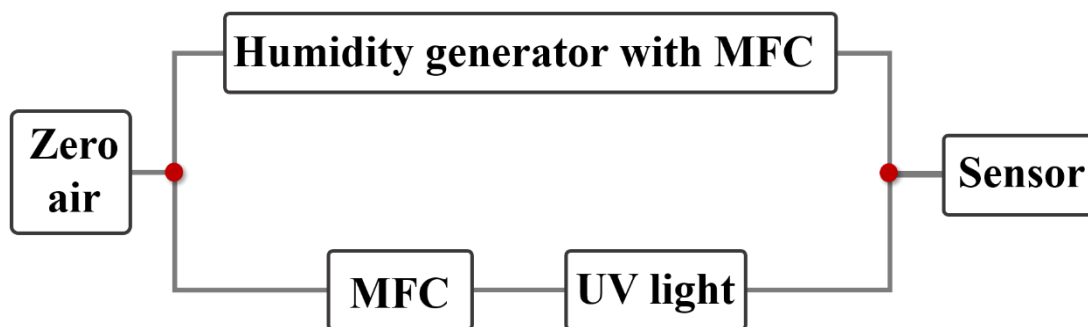

**Figure S16.** The schematic of the setup for O<sub>3</sub> sensing test.

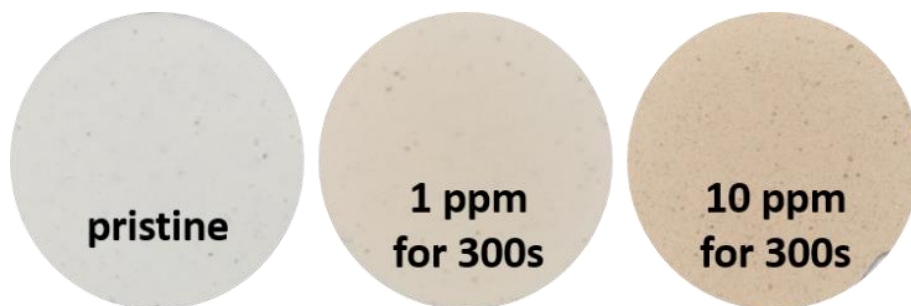

**Figure S17.** Photographs of BUT-82 films after 300s of O<sub>3</sub> purging with different concentrations at 50% RH.

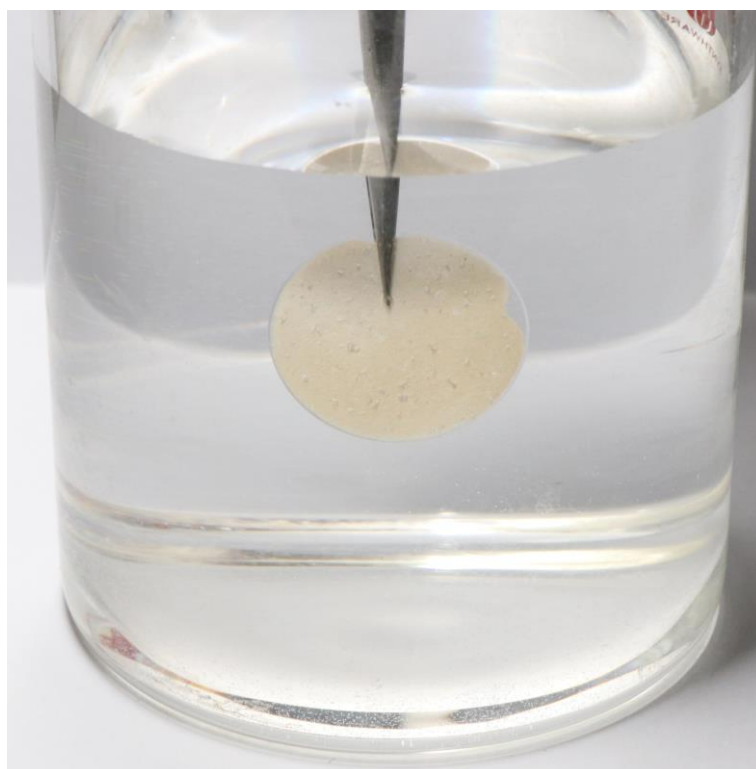

**Figure S18.** The photograph of the BUT-82 film in H<sub>2</sub>O after O<sub>3</sub> bubbling treatment.

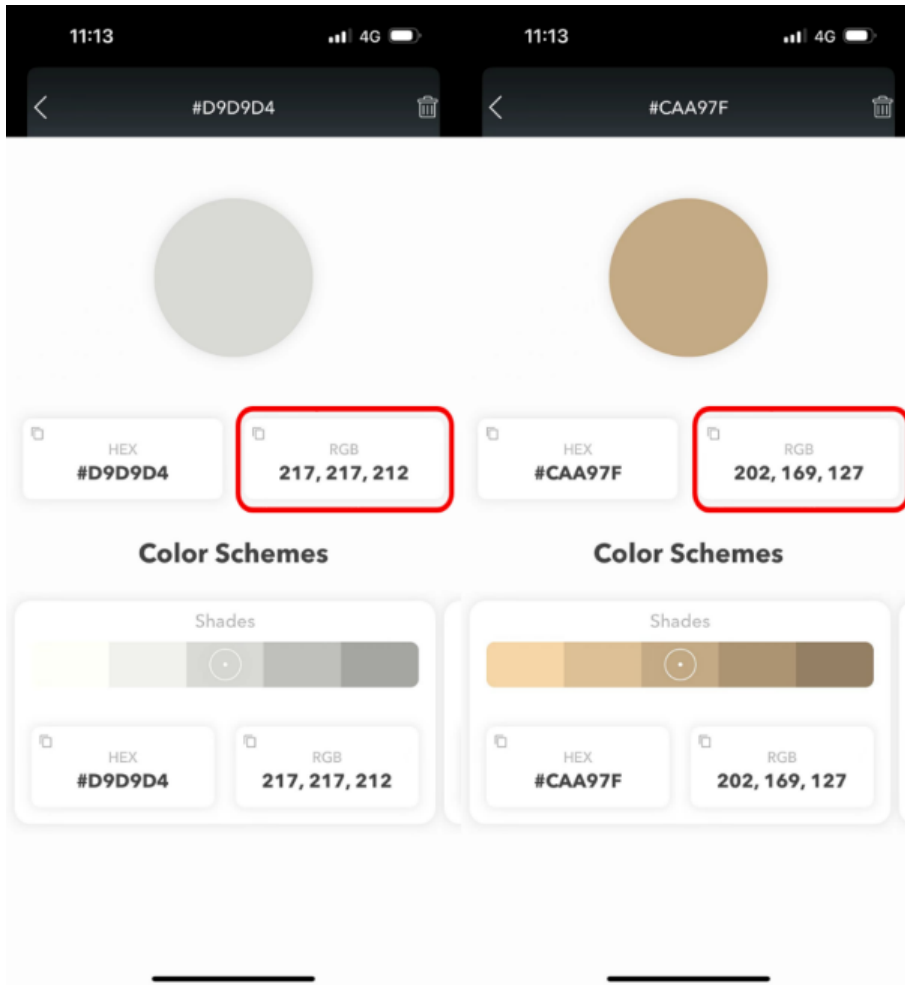

**Figure S19.** The color recognition software on the smart phone.



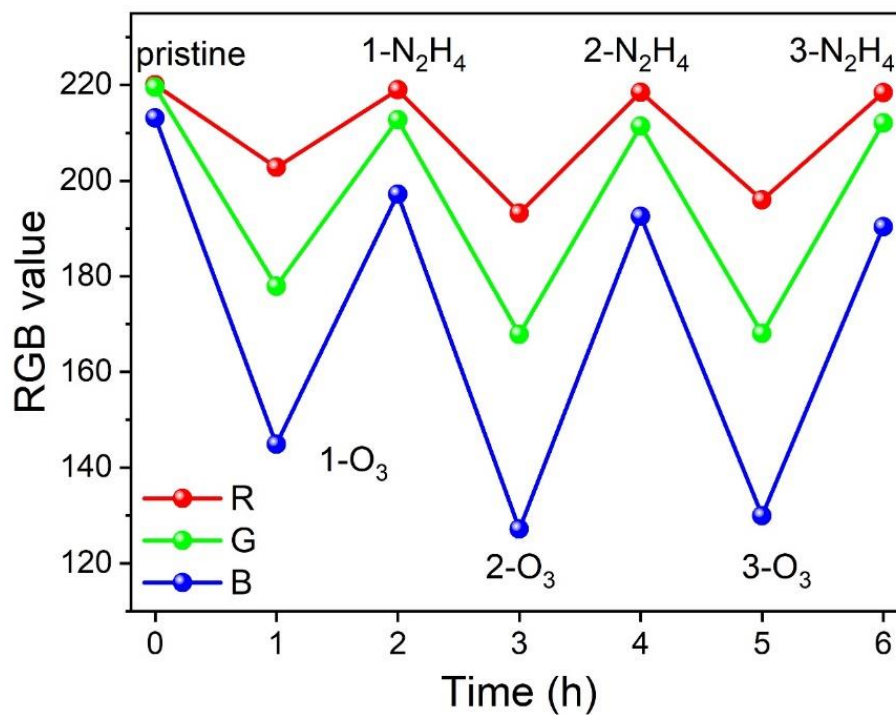

**Figure S20.** RGB values response of BUT-82 films in the cycle test of O<sub>3</sub> sensing.

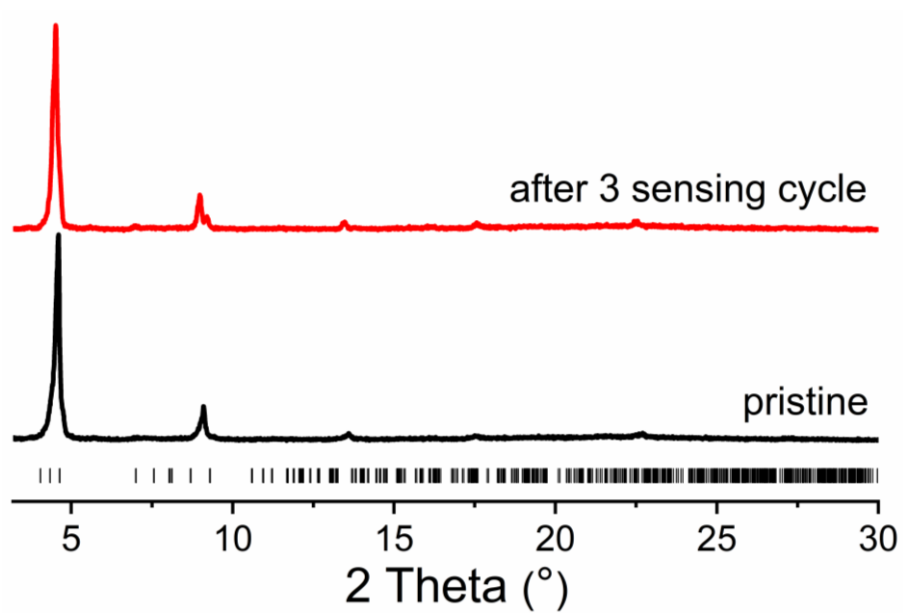

**Figure S21.** PXRD patterns of the BUT-82 film before and after the cycle test of O<sub>3</sub> sensing.

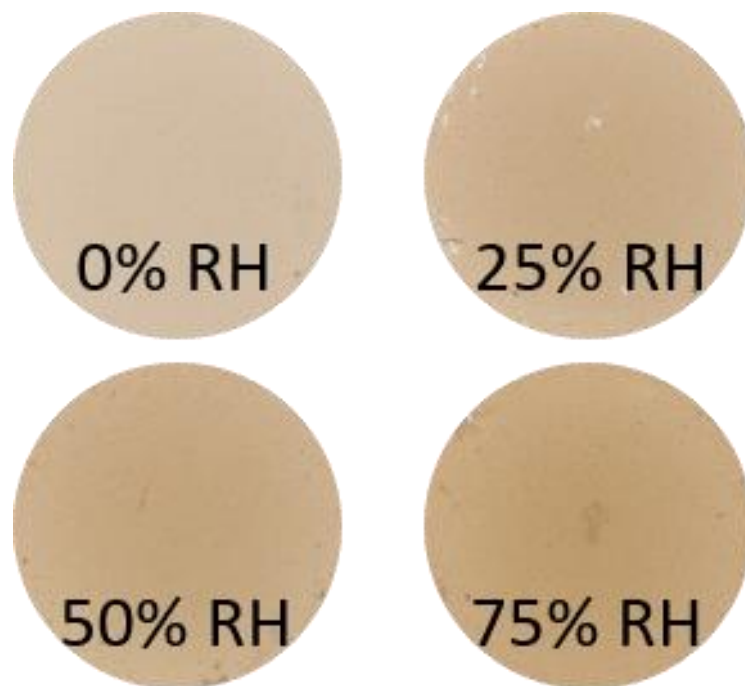

**Figure S22.** Photographs of BUT-82 films after 60 min of 50 ppm O<sub>3</sub> purging at various humidity levels.

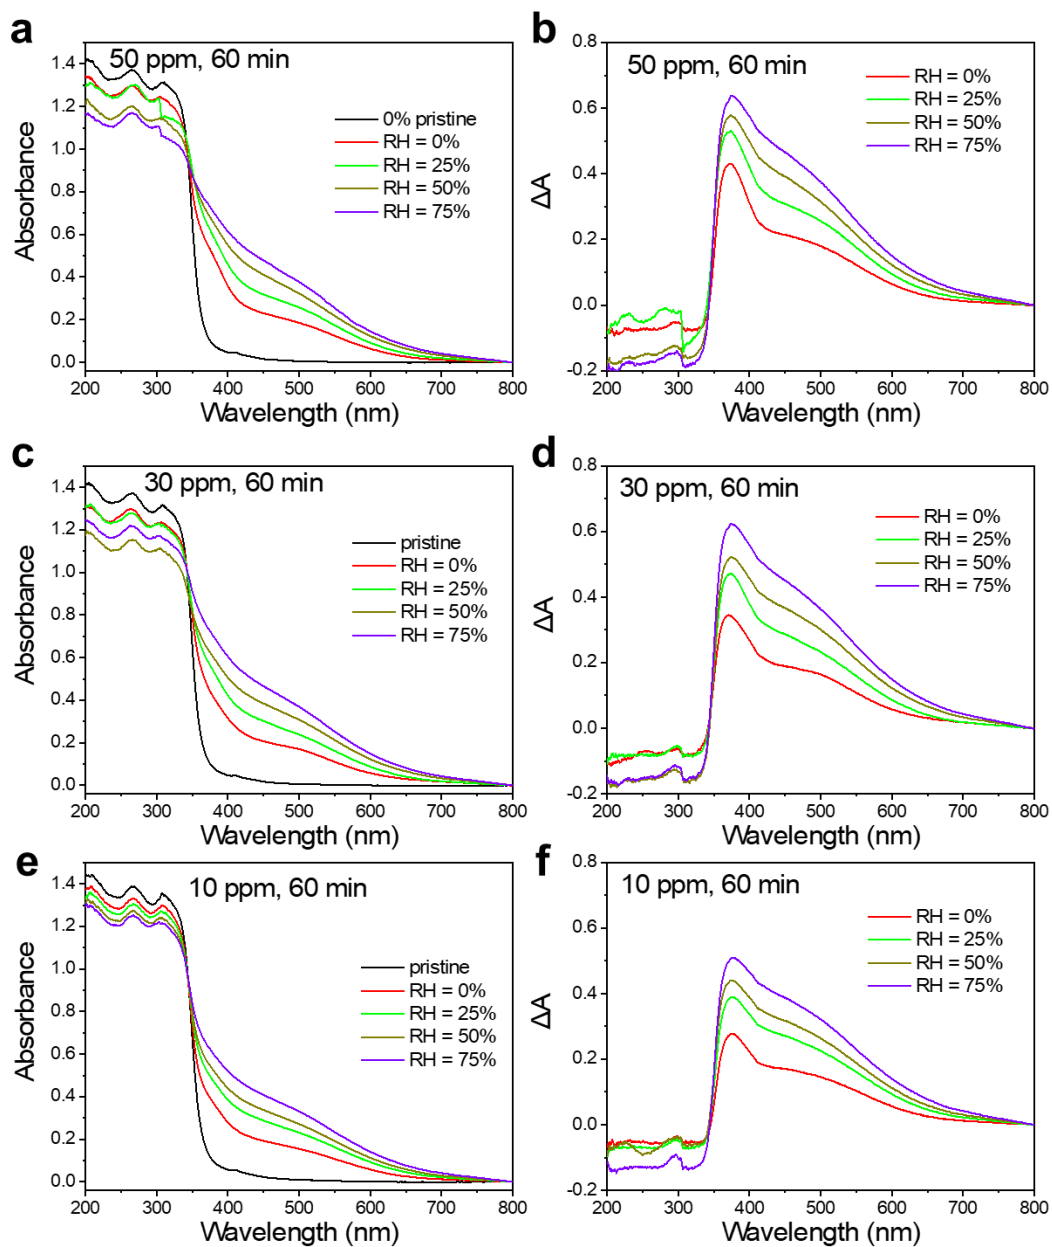

**Figure S23.** UV/Vis spectra and absorption difference of BUT-82 films after  $O_3$  purging with various concentrations under different relative humidity levels. (a, b) 50 ppm, (c, d) 30 ppm, and (e, f) 10 ppm.

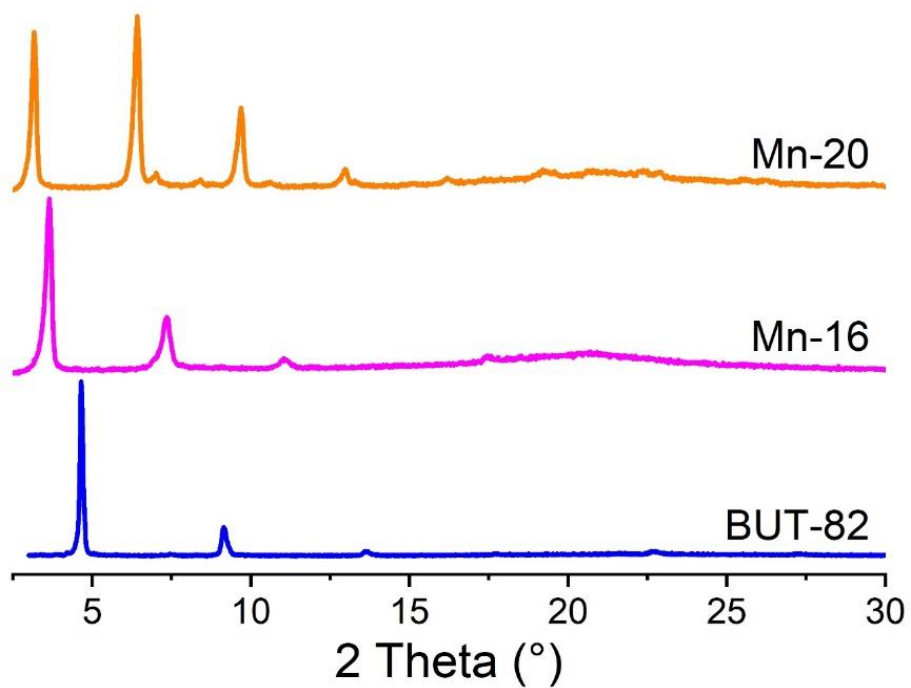

**Figure S24.** PXRD patterns of BUT-82, Mn-16, and Mn-20 samples.

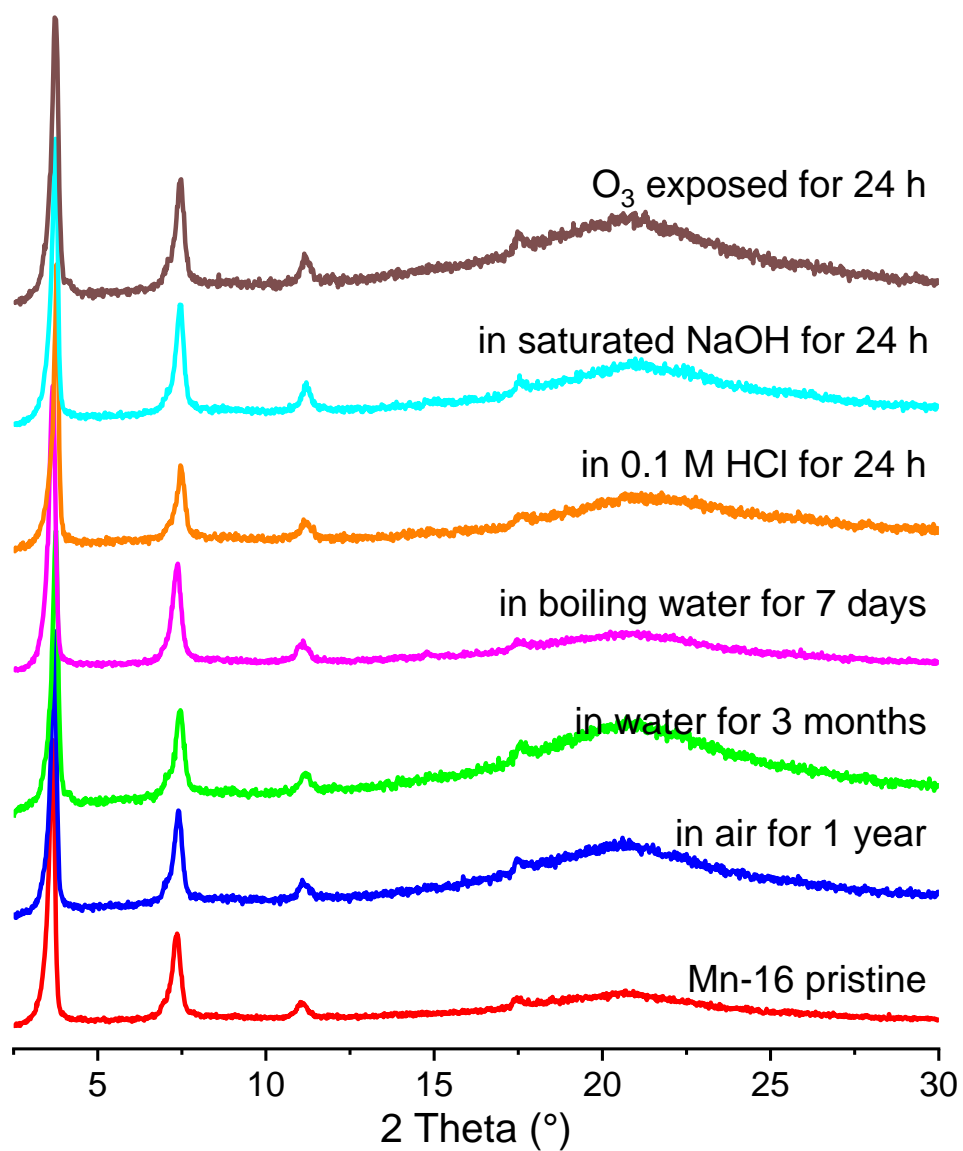

**Figure S25.** PXRD patterns of Mn-16 samples treated under different conditions.

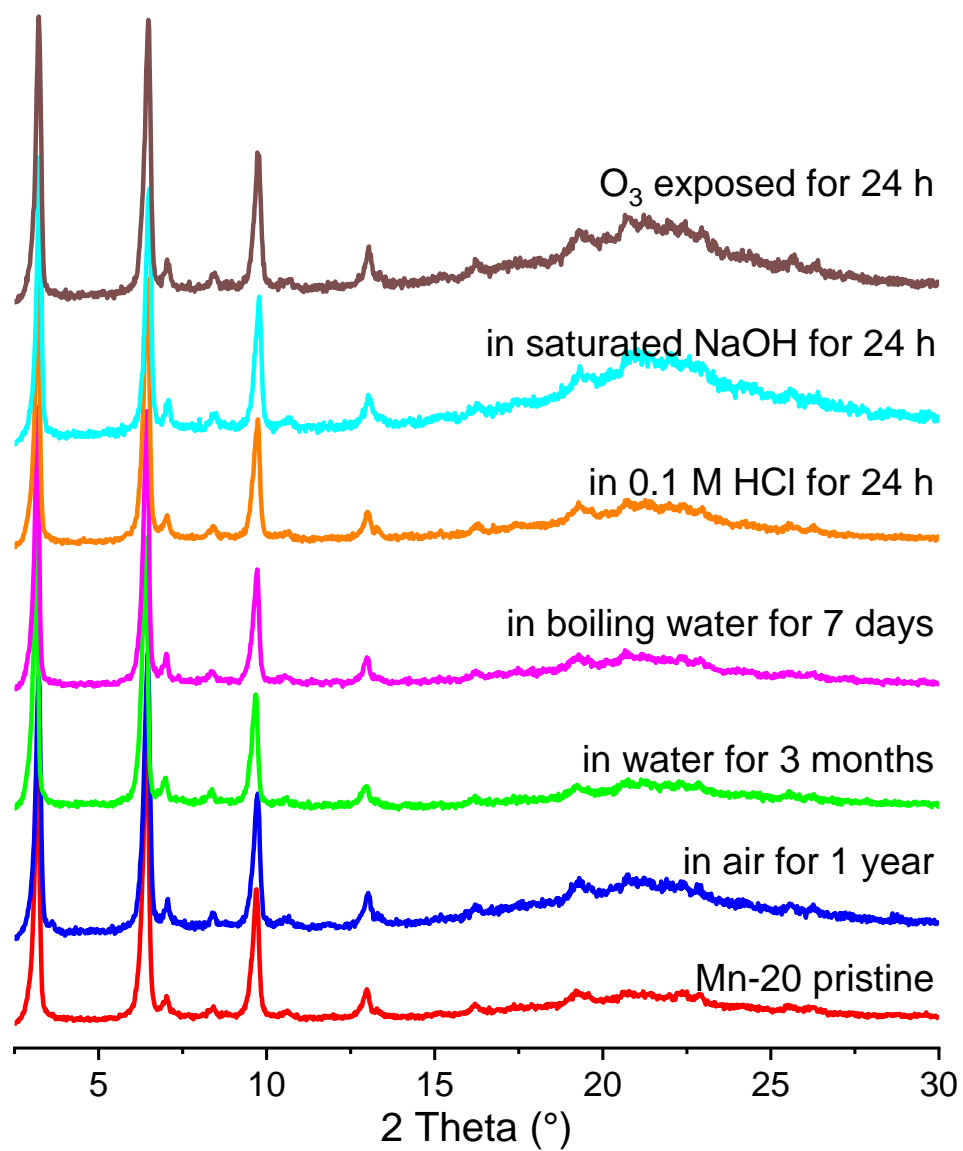

**Figure S26.** PXRD patterns of Mn-20 samples treated under different conditions.

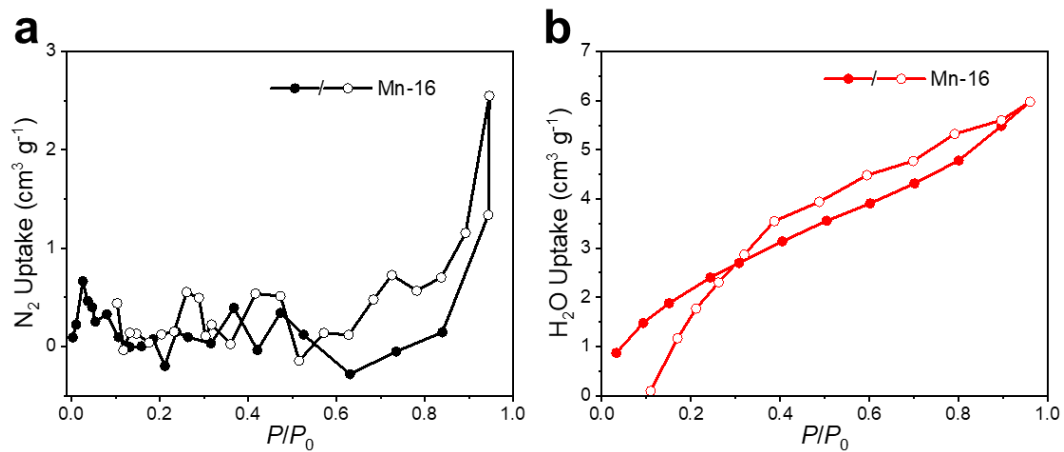

**Figure S27.** (a)  $\text{N}_2$  adsorption/desorption isotherms at 77 K and (b) water adsorption/desorption isotherms at 298 K of Mn-16.



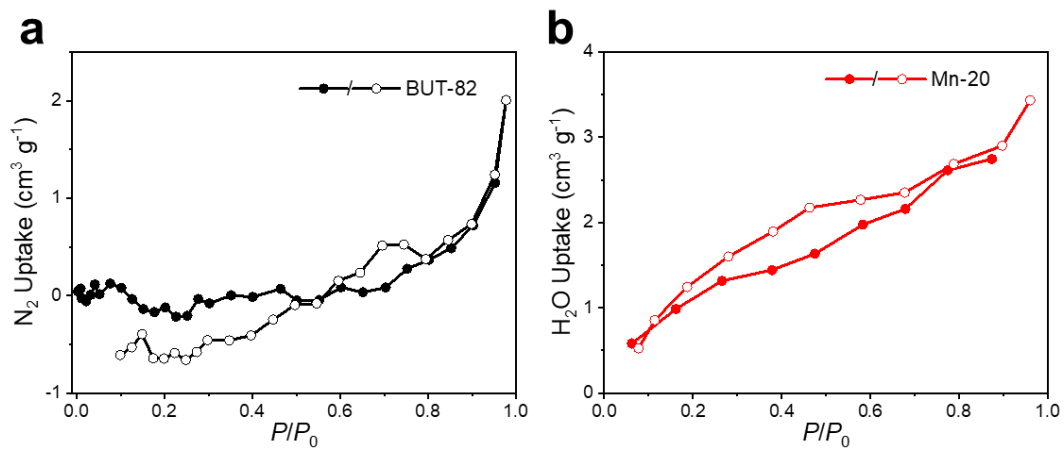

**Figure S28.** (a) N<sub>2</sub> adsorption/desorption isotherms at 77 K and (b) water adsorption/desorption isotherms at 298 K of Mn-20.

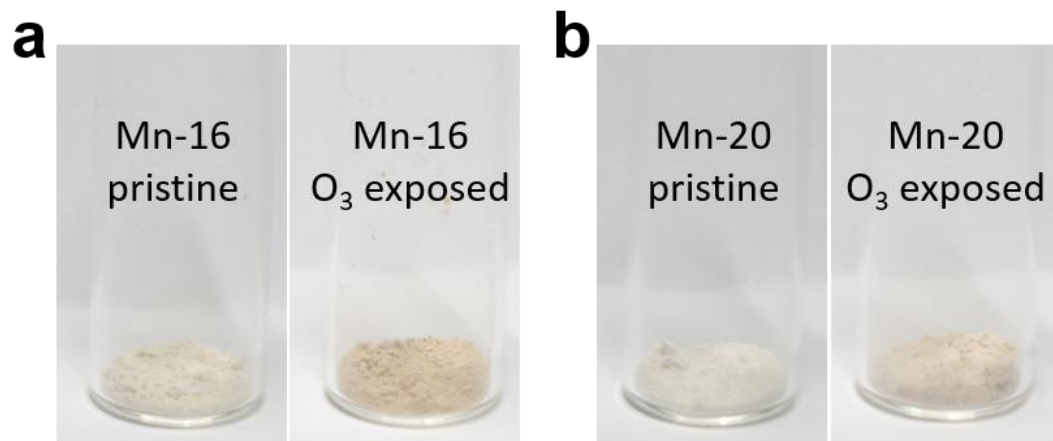

**Figure S29.** Photographs of pristine and O<sub>3</sub> exposed (a) Mn-16 and (b) Mn-20 samples.

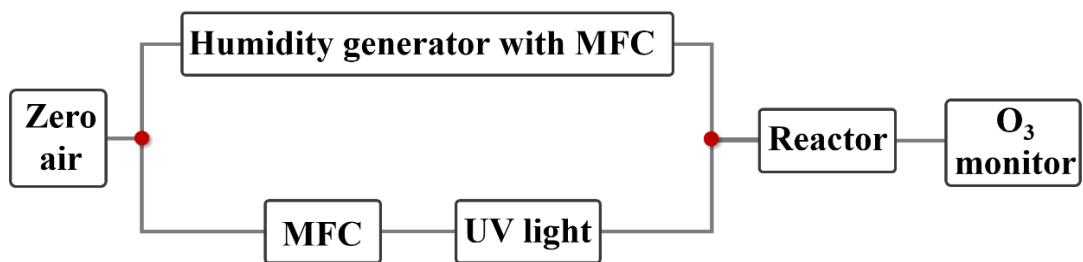

**Figure S30.** The schematic of the setup for O<sub>3</sub> decomposition test.

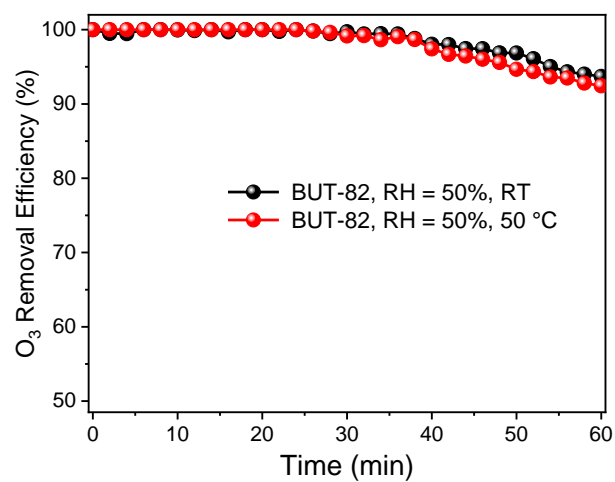

**Figure S31.** The O<sub>3</sub> removal efficiencies for BUT-82. Other test conditions: 0.02 g test substance diluted with 0.4 g quartz sand, concentration of O<sub>3</sub> = 1 ppm, flow rate = 0.5 L min<sup>-1</sup>, RT or 50 °C.
